# Supplementary material for: Looking the Cow in the Eye: Deletion in the NID1 Gene Is Associated with Recessive Inherited Cataract in Romagnola Cattle
Source: PubMed Central journal article supplement (PMC4210201; doi:10.1371/journal.pone.0110628), 2014-10-27
Supplement: pone.0110628.s004.pdf [file pone.0110628.s004.pdf]

## Figure S4:

### Wild-type Nidogen-1

MLATVRRSGAAWTRALLLQLLLAGPGGCLSRQELFFPGPEHGDLELEAGDDLVS PALELSTALHFFDRSDI  
DSVYVTTNGIIMSEPPAKETHPGFPPTFGAVAPFLADLDTTDGLGKVYYREDLSPSVTQLAAECVQRGFP  
EVSFKPSSAVVVWESVAPYQGPSKDPTLEGKRNTFQSILASSDSSTYAIFLYPEDGLQFYTTFSKKEENQVP  
AVVAFSQGLVGLIWKSDGAYNIFANDKESIGNLAKSSNSGLQGIWVFEIGSPATASGVVPADVNLGLDDGTE  
YDDEDYDSVTRVGLEDAVTTSFPYEAPGRGDSGTYNTPSDLSPRRMATERPLTPPTEKTRSFQLPGERFPQQ  
QPQVIDVDEVEETEIVFRYNTDSRQTCANNRHQCSVHAECRDFATGFCCRCVAGYTGNGRQCVAEGSPQR  
VNGKVKGRIFVGDSDQVPIVFENTDLHSYVVMNHGRSYTAISTIPETVGYSLLPLAPIGGIIGWMFAVEQDGF  
KNGFSITGGEFTRQAEVTFVGHDRDKLIKQFSGIDEHGHLTIDTELEGRVPQIAFGSSVHIEPYTELYHYSR  
QVITSFSTREYTVTEPERHGTAPSHAHTYRWRQTITFRECLHDDSRPALPSTQQLSVDSVFLYNQEERILR  
YALSNSIGPVRDGS PDALQNPCYIGSHGCDSNAACRPGPGTQFTCECSIGFRGDGRTCYDIDECSEQPSVCG  
NHAICNNHPGTFRCECVEGYQFSEAGTCVAAVGLRPVNH CETGLHDCDIPQRARCIYMGSSYTCCLPGF  
SGDGRACQDVDECQPSRCHPDAFCYNTPGSFTCRCKSGYQGDGFHCVPGVVEKTRCQHEREHILGTADSS  
RPRPPGLFVPECDEHGQYVPTQCHSSTGYCWCVDRD GREVQGTTRTRSGMRPPCLSTVAPPVHYGPPVPTT  
VIPLPPGTHLLFAQTGKIERLPLEGSTMTKSEAKTLLHAPGKVIIGLAFDCVDKVMVYWTDISQPSIGRASLHG  
GEPATIVRQDLGSPGIALDHLGRNIFWTDSQLDRIEVAKLDGTQRRVLFETDLVNPRGIVTDSVRGNLYW  
TDWNRDNPKIETS YMDGTNRRLVQDDLGLPNGLTFDAYSSQLCWVDAGAHRAECLKPGQSSRRKVL EGL  
QYPPFAVTSFGKNLYYTDWKTNSVVAVDLAVSKETDSFHPHKQTRLYGITSALSQCPEGHNYCSVNNGGCTH  
LCLATPGSRTCRCPDNTLGVDCIERK

### Mutant Nidogen-1

MLATVRRSGAAWTRALLLQLLLAGPGGCLSRQELFFPGPEHGDLELEAGDDLVS PALELSTALHFFDRSDI  
DSVYVTTNGIIMSEPPAKETHPGFPPTFGAVAPFLADLDTTDGLGKVYYREDLSPSVTQLAAECVQRGFP  
EVSFKPSSAVVVWESVAPYQGPSKDPTLEGKRNTFQSILASSDSSTYAIFLYPEDGLQFYTTFSKKEENQVP  
AVVAFSQGLVGLIWKSDGAYNIFANDKESIGNLAKSSNSGLQGIWVFEIGSPATASGVVPADVNLGLDDGTE  
YDDEDYDSVTRVGLEDAVTTSFPYEAPGRGDSGTYNTPSDLSPRRMATERPLTPPTEKTRSFQLPGERFPQQ  
QPQVIDVDEVEETEIVFRYNTDSRQTCANNRHQCSVHAECRDFATGFCCRCVAGYTGNGRQCVAEGSPQR  
VNGKVKGRIFVGDSDQVPIVFENTDLHSYVVMNHGRSYTAISTIPETVGYSLLPLAPIGGIIGWMFAVEQDGF  
KNGFSITGGEFTRQAEVTFVGHDRDKLIKQFSGIDEHGHLTIDTELEGRVPQIAFGSSVHIEPYTELYHYSR  
QVITSFSTREYTVTEPERHGTAPSHAHTYRWRQTITFRECLHDDSRPALPSTQQLSVDSVFLYNQEERILR  
YALSNSIGPVRDGS PDALQNPCYIGSHGCDSNAACRPGPGTQFTCECSIGFRGDGRTCYDIDECSEQPSVCG  
NHAICNNHPGTFRCECVEGYQFSEAGTCVAAVGLRPVNH CETGLHDCDIPQRARCIYMGSSYTCCLPGF  
SGDGRACQDVDECQPSRCHPDAFCYNTPGSFTCRCKSGYQGDGFHCVPGVVEKTRCQHEREHILGTADSS  
RPRPPGLFVPECDEHGQYVPTQCHSSTGYCWCVDRD GREVQGTTRTRSGMRPPCLSTVAPPVHYGPPVPTT  
VIPLPPGTHLLFAQTGKIERLPLEGSTMTKSEAKTLLHAPGKVIIGLAFDCVDKVMVYWTDISQPSIGRASLHG  
GEPATIVRQDLGSPGIALDHLGRNIFWTDSQLDRIEVAKLDGTQRRVLFETDLVNPRGIVTDSVRGNLYW  
TDWNRDNPKIETS YMDGTNRRLVQDDLGLPNGLTFDAYSSQLCWVDAGAHRAECLKPGQSSRRKVL EGL  
QYPPFAVTSFGKNLYYTDWKTSQLLSEQRWLHPPLLGHPKQDLPLP
