# Supplementary material for: Looking the Cow in the Eye: Deletion in the NID1 Gene Is Associated with Recessive Inherited Cataract in Romagnola Cattle
Source: PubMed Central journal article supplement (PMC4210201; doi:10.1371/journal.pone.0110628), 2014-10-27
Supplement: pone.0110628.s005.pdf [file pone.0110628.s005.pdf]

**Table S1** – Top 14 significant SNPs

|                           | <b>Chromosome</b> | <b>Position*</b> | <b>chi2.1df**</b> | <b>P1df#</b> | <b>Pc1df##</b> |
|---------------------------|-------------------|------------------|-------------------|--------------|----------------|
| <b>BovineHD4100018479</b> | 28                | 6962697          | 41.68619          | 1.07E-10     | 1.78E-10       |
| <b>BovineHD2800003023</b> | 28                | 9889547          | 41.68619          | 1.07E-10     | 1.78E-10       |
| <b>BovineHD2800003025</b> | 28                | 9895373          | 41.68619          | 1.07E-10     | 1.78E-10       |
| <b>BovineHD2800001993</b> | 28                | 6673247          | 38.69312          | 4.96E-10     | 7.94E-10       |
| <b>BovineHD2800002417</b> | 28                | 8136855          | 36.37167          | 1.63E-09     | 2.54E-09       |
| <b>BovineHD2800002989</b> | 28                | 9781603          | 36.27947          | 1.71E-09     | 2.66E-09       |
| <b>BovineHD2800002459</b> | 28                | 8246055          | 36.17842          | 1.80E-09     | 2.80E-09       |
| <b>BovineHD2800002463</b> | 28                | 8256824          | 36.17842          | 1.80E-09     | 2.80E-09       |
| <b>BovineHD2800003032</b> | 28                | 9901827          | 36.15676          | 1.82E-09     | 2.83E-09       |
| <b>BovineHD2800001012</b> | 28                | 3323642          | 36.14479          | 1.83E-09     | 2.85E-09       |
| <b>BovineHD2800003073</b> | 28                | 10056945         | 34.25629          | 4.83E-09     | 7.34E-09       |
| <b>BovineHD2800003074</b> | 28                | 10061325         | 34.25629          | 4.83E-09     | 7.34E-09       |
| <b>BovineHD2800002415</b> | 28                | 8115821          | 34.15846          | 5.08E-09     | 7.71E-09       |
| <b>BovineHD2800002987</b> | 28                | 9767515          | 34.02109          | 5.45E-09     | 8.26E-09       |

\*precise location of the SNP on the respective cattle chromosome.

\*\*chi2.1df: Chi-square distribution of 1-d.f.

#P1df: corresponding list of P-values of 1-d.f. (additive or allelic) test for association between SNP and trait.

##Pc1df: P-values from the 1-d.f. test for association between SNP and trait (statistics is corrected for possible inflation); 1-d.f. = 1 degree of freedom.
