# Supplementary material for: Looking the Cow in the Eye: Deletion in the NID1 Gene Is Associated with Recessive Inherited Cataract in Romagnola Cattle
Source: PubMed Central journal article supplement (PMC4210201; doi:10.1371/journal.pone.0110628), 2014-10-27
Supplement: pone.0110628.s006.pdf [file pone.0110628.s006.pdf]

**Table S2** Homozygous regions

| Chromosome | SNP1               | SNP2               | BP 1      | BP 2      | Kb      |
|------------|--------------------|--------------------|-----------|-----------|---------|
| 3          | BovineHD0300009807 | BovineHD0300025557 | 31235235  | 89181936  | 57946.7 |
| 6          | BovineHD0600017644 | BovineHD0600018930 | 63741074  | 68588167  | 4847.09 |
| 7          | BovineHD0700014840 | BovineHD0700015161 | 50959514  | 52464670  | 1505.16 |
| 8          | BovineHD0800031812 | BovineHD0800032314 | 106523016 | 107763189 | 1240.17 |
| 28         | BovineHD2800000895 | BovineHD2800003081 | 2870897   | 10073583  | 7202.69 |

Extended regions of homozygosity with simultaneous allele sharing among all the four cases. SNP1, SNP2: name of the flanking SNPs. BP1, BP2: base pair position of the SNP1 and SNP2, respectively. Kb: size of the region in kilobases.
