# Supplementary material for: Looking the Cow in the Eye: Deletion in the NID1 Gene Is Associated with Recessive Inherited Cataract in Romagnola Cattle
Source: PubMed Central journal article supplement (PMC4210201; doi:10.1371/journal.pone.0110628), 2014-10-27
Supplement: pone.0110628.s007.pdf [file pone.0110628.s007.pdf]

**Table S3** List of all the variants in the candidate region. Non-synonymous variants are bolded.

| CHROM | POS     | REF      | ALT      | Effect                       | Gene                      | exonRank  |
|-------|---------|----------|----------|------------------------------|---------------------------|-----------|
| 28    | 3039955 | T        | C        | DOWNSTREAM                   | Q0VC87_BOVIN              |           |
|       |         |          |          | UTR_3_PRIME                  | Q0VC87_BOVIN              | 6         |
| 28    | 3040356 | T        | C        | DOWNSTREAM                   | Q0VC87_BOVIN              |           |
|       |         |          |          | UTR_3_PRIME                  | Q0VC87_BOVIN              | 6         |
| 28    | 3040696 | T        | C        | UTR_3_PRIME                  | Q0VC87_BOVIN              | 6         |
| 28    | 3188097 | G        | A        | EXON                         | ENSBTAG00000012132        | 1         |
| 28    | 3333880 | A        | AT       | UTR_3_PRIME                  | ENSBTAG00000010500        | 4         |
| 28    | 3390913 | A        | G        | SYNONYMOUS_CODING            | GNPAT                     | 18        |
| 28    | 3390916 | <b>C</b> | <b>T</b> | <b>NON_SYNONYMOUS_CODING</b> | <b>GNPAT</b>              | <b>18</b> |
| 28    | 3412039 | <b>C</b> | <b>T</b> | <b>NON_SYNONYMOUS_CODING</b> | <b>GNPAT</b>              | <b>6</b>  |
| 28    | 3418467 | <b>C</b> | <b>T</b> | <b>NON_SYNONYMOUS_CODING</b> | <b>C1orf131</b>           | <b>1</b>  |
|       |         |          |          | UPSTREAM                     | GNPAT                     |           |
| 28    | 3418502 | <b>C</b> | <b>A</b> | <b>NON_SYNONYMOUS_CODING</b> | <b>C1orf131</b>           | <b>1</b>  |
|       |         |          |          | UPSTREAM                     | GNPAT                     |           |
| 28    | 3418503 | <b>A</b> | <b>G</b> | <b>NON_SYNONYMOUS_CODING</b> | <b>C1orf131</b>           | <b>1</b>  |
|       |         |          |          | UPSTREAM                     | GNPAT                     |           |
| 28    | 3448465 | T        | C        | SYNONYMOUS_CODING            | C1orf131                  | 5         |
| 28    | 3460901 | GC       | G        | INTRON                       | TRIM67                    | 14        |
| 28    | 3519455 | T        | C        | SYNONYMOUS_CODING            | TRIM67                    | 2         |
| 28    | 3519609 | <b>A</b> | <b>G</b> | <b>NON_SYNONYMOUS_CODING</b> | <b>TRIM67</b>             | <b>2</b>  |
| 28    | 3777122 | <b>A</b> | <b>G</b> | <b>NON_SYNONYMOUS_CODING</b> | <b>TTC13</b>              | <b>15</b> |
| 28    | 3780843 | C        | T        | SYNONYMOUS_CODING            | TTC13                     | 17        |
| 28    | 3793749 | T        | C        | UTR_3_PRIME                  | TTC13                     | 23        |
| 28    | 3962482 | T        | C        | INTRON                       | ENSBTAG00000045932        | 8         |
|       |         |          |          | INTRON                       | ENSBTAG00000045932        | 12        |
|       |         | <b>T</b> | <b>C</b> | <b>NON_SYNONYMOUS_CODING</b> | <b>ENSBTAG00000045932</b> | <b>9</b>  |
| 28    | 3962491 | C        | T        | INTRON                       | ENSBTAG00000045932        | 8         |

|    |         |          |          |                              |                           |           |
|----|---------|----------|----------|------------------------------|---------------------------|-----------|
|    |         |          |          | INTRON                       | ENSBTAG00000045932        | 12        |
|    |         | <b>C</b> | <b>T</b> | <b>NON_SYNONYMOUS_CODING</b> | <b>ENSBTAG00000045932</b> | <b>9</b>  |
| 28 | 3962516 | G        | T        | INTRON                       | ENSBTAG00000045932        | 8         |
|    |         |          |          | INTRON                       | ENSBTAG00000045932        | 12        |
| 28 | 3962644 | A        | G        | INTRON                       | ENSBTAG00000045932        | 8         |
|    |         |          |          | <b>NON_SYNONYMOUS_CODING</b> | <b>ENSBTAG00000045932</b> | <b>8</b>  |
|    |         |          |          | <b>NON_SYNONYMOUS_CODING</b> | <b>ENSBTAG00000045932</b> | <b>11</b> |
| 28 | 3962745 | C        | T        | INTRON                       | ENSBTAG00000045932        | 8         |
|    |         |          |          | <b>NON_SYNONYMOUS_CODING</b> | <b>ENSBTAG00000045932</b> | <b>7</b>  |
|    |         |          |          | <b>NON_SYNONYMOUS_CODING</b> | <b>ENSBTAG00000045932</b> | <b>10</b> |
| 28 | 3963070 | <b>G</b> | <b>T</b> | <b>NON_SYNONYMOUS_CODING</b> | <b>ENSBTAG00000045932</b> | <b>8</b>  |
|    |         |          |          | <b>NON_SYNONYMOUS_CODING</b> | <b>ENSBTAG00000045932</b> | <b>6</b>  |
| 28 | 3963654 | <b>T</b> | <b>C</b> | <b>NON_SYNONYMOUS_CODING</b> | <b>ENSBTAG00000045932</b> | <b>6</b>  |
|    |         |          |          | <b>NON_SYNONYMOUS_CODING</b> | <b>ENSBTAG00000045932</b> | <b>5</b>  |
|    |         |          |          | <b>NON_SYNONYMOUS_CODING</b> | <b>ENSBTAG00000045932</b> | <b>6</b>  |
| 28 | 3963696 | <b>C</b> | <b>A</b> | <b>NON_SYNONYMOUS_CODING</b> | <b>ENSBTAG00000045932</b> | <b>6</b>  |
|    |         |          |          | <b>NON_SYNONYMOUS_CODING</b> | <b>ENSBTAG00000045932</b> | <b>5</b>  |
| 28 | 3963759 | T        | C        | INTRON                       | ENSBTAG00000045932        | 5         |
|    |         |          |          | <b>NON_SYNONYMOUS_CODING</b> | <b>ENSBTAG00000045932</b> | <b>5</b>  |
|    |         |          |          | SYNONYMOUS_CODING            | ENSBTAG00000045932        | 5         |
| 28 | 3963829 | <b>C</b> | <b>T</b> | <b>NON_SYNONYMOUS_CODING</b> | <b>ENSBTAG00000045932</b> | <b>5</b>  |
|    |         |          |          | <b>NON_SYNONYMOUS_CODING</b> | <b>ENSBTAG00000045932</b> | <b>4</b>  |
| 28 | 3963857 | T        | C        | INTRON                       | ENSBTAG00000045932        | 4         |
|    |         |          |          | <b>NON_SYNONYMOUS_CODING</b> | <b>ENSBTAG00000045932</b> | <b>4</b>  |
|    |         |          |          | <b>SPLICE_SITE_ACCEPTOR</b>  | <b>ENSBTAG00000045932</b> | <b>5</b>  |
| 28 | 3963871 | T        | C        | INTRON                       | ENSBTAG00000045932        | 4         |
|    |         |          |          | <b>NON_SYNONYMOUS_CODING</b> | <b>ENSBTAG00000045932</b> | <b>4</b>  |
| 28 | 3964067 | G        | GA       | INTRON                       | ENSBTAG00000045932        | 3         |
|    |         |          |          | <b>SPLICE_SITE_ACCEPTOR</b>  | <b>ENSBTAG00000045932</b> | <b>4</b>  |
|    |         |          |          | <b>SPLICE_SITE_DONOR</b>     | <b>ENSBTAG00000045932</b> | <b>3</b>  |

|    |         |   |     |                              |                           |           |
|----|---------|---|-----|------------------------------|---------------------------|-----------|
| 28 | 3964083 | T | C   | INTRON                       | ENSBTAG00000045932        | 3         |
|    |         |   |     | <b>NON_SYNONYMOUS_CODING</b> | <b>ENSBTAG00000045932</b> | <b>3</b>  |
| 28 | 3964152 | G | A   | <b>NON_SYNONYMOUS_CODING</b> | <b>ENSBTAG00000045932</b> | <b>3</b>  |
| 28 | 3964205 | C | T   | SYNONYMOUS_CODING            | ENSBTAG00000045932        | 3         |
| 28 | 3964227 | C | T   | <b>NON_SYNONYMOUS_CODING</b> | <b>ENSBTAG00000045932</b> | <b>3</b>  |
| 28 | 3964244 | G | A   | SYNONYMOUS_CODING            | ENSBTAG00000045932        | 3         |
| 28 | 3964276 | T | A,G | <b>STOP_GAINED</b>           | <b>ENSBTAG00000045932</b> | <b>3</b>  |
|    |         |   |     | SYNONYMOUS_CODING            | ENSBTAG00000045932        | 3         |
| 28 | 3964290 | T | C   | <b>NON_SYNONYMOUS_CODING</b> | <b>ENSBTAG00000045932</b> | <b>3</b>  |
| 28 | 3964321 | C | T   | <b>NON_SYNONYMOUS_CODING</b> | <b>ENSBTAG00000045932</b> | <b>3</b>  |
| 28 | 3964341 | T | C   | INTRON                       | ENSBTAG00000045932        | 2         |
|    |         |   |     | <b>SPLICE_SITE_ACCEPTOR</b>  | <b>ENSBTAG00000045932</b> | <b>3</b>  |
| 28 | 3964342 | G | A   | INTRON                       | ENSBTAG00000045932        | 2         |
| 28 | 3964374 | A | G   | INTRON                       | ENSBTAG00000045932        | 2         |
|    |         |   |     | <b>NON_SYNONYMOUS_CODING</b> | <b>ENSBTAG00000045932</b> | <b>2</b>  |
| 28 | 3964425 | G | A   | INTRON                       | ENSBTAG00000045932        | 1         |
|    |         |   |     | <b>NON_SYNONYMOUS_CODING</b> | <b>ENSBTAG00000045932</b> | <b>2</b>  |
| 28 | 3964557 | G | A   | SYNONYMOUS_CODING            | ENSBTAG00000045932        | 1         |
| 28 | 3964585 | A | G   | <b>NON_SYNONYMOUS_CODING</b> | <b>ENSBTAG00000045932</b> | <b>1</b>  |
| 28 | 3987172 | T | C   | <b>NON_SYNONYMOUS_CODING</b> | <b>ENSBTAG00000039845</b> | <b>5</b>  |
| 28 | 3987441 | G | A   | SYNONYMOUS_CODING            | ENSBTAG00000039845        | 5         |
| 28 | 3987483 | C | G   | <b>NON_SYNONYMOUS_CODING</b> | <b>ENSBTAG00000039845</b> | <b>5</b>  |
| 28 | 3987566 | A | G   | SYNONYMOUS_CODING            | ENSBTAG00000039845        | 4         |
| 28 | 3987683 | C | T   | INTRON                       | ENSBTAG00000039845        | 3         |
| 28 | 3987860 | C | G   | <b>NON_SYNONYMOUS_CODING</b> | <b>ENSBTAG00000039845</b> | <b>2</b>  |
| 28 | 4122112 | G | A   | <b>NON_SYNONYMOUS_CODING</b> | <b>ENSBTAG00000025021</b> | <b>1</b>  |
| 28 | 4262866 | C | G   | INTRON                       | ENSBTAG00000025021        | 6         |
| 28 | 4263657 | T | C   | SYNONYMOUS_CODING            | ENSBTAG00000025021        | 7         |
| 28 | 4263753 | G | C   | SYNONYMOUS_CODING            | ENSBTAG00000025021        | 7         |
| 28 | 5292858 | A | G   | <b>NON_SYNONYMOUS_CODING</b> | <b>SIPA1L2</b>            | <b>13</b> |

|            |         |     |   |                              |                           |           |
|------------|---------|-----|---|------------------------------|---------------------------|-----------|
| 28         | 5292897 | C   | T | <b>NON_SYNONYMOUS_CODING</b> | <b>SIPA1L2</b>            | <b>13</b> |
| 28         | 5293106 | C   | T | SYNONYMOUS_CODING            | SIPA1L2                   | 13        |
| 28         | 5299373 | C   | T | SYNONYMOUS_CODING            | SIPA1L2                   | 9         |
| 28         | 5347581 | A   | G | <b>NON_SYNONYMOUS_CODING</b> | <b>SIPA1L2</b>            | <b>2</b>  |
| 28         | 5713156 | C   | T | SYNONYMOUS_CODING            | K1383_BOVIN               | 1         |
| 28         | 5872194 | T   | C | UTR_5_PRIME                  | F1MM52_BOVIN              | 1         |
| 28         | 5872208 | G   | T | UTR_5_PRIME                  | F1MM52_BOVIN              | 1         |
| 28         | 5872247 | T   | C | UTR_5_PRIME                  | F1MM52_BOVIN              | 1         |
| 28         | 5872313 | G   | T | UTR_5_PRIME                  | F1MM52_BOVIN              | 1         |
| 28         | 5878021 | T   | C | SYNONYMOUS_CODING            | F1MM52_BOVIN              | 2         |
| 28         | 5909820 | G   | A | INTRON                       | F1MM52_BOVIN              | 4         |
| 28         | 5910015 | C   | G | UTR_3_PRIME                  | F1MM52_BOVIN              | 5         |
| 28         | 5910417 | GTT | G | UTR_3_PRIME                  | F1MM52_BOVIN              | 5         |
| 28         | 5910473 | G   | A | DOWNSTREAM                   | F1MM52_BOVIN              |           |
| INTERGENIC |         |     |   |                              |                           |           |
| 28         | 5917639 | A   | G | SYNONYMOUS_CODING            | PCNXL2                    | 33        |
| 28         | 5984896 | A   | G | SYNONYMOUS_CODING            | PCNXL2                    | 25        |
| 28         | 6054537 | G   | A | SYNONYMOUS_CODING            | PCNXL2                    | 21        |
| 28         | 6083098 | C   | T | <b>NON_SYNONYMOUS_CODING</b> | <b>PCNXL2</b>             | <b>19</b> |
| 28         | 6084058 | A   | G | <b>NON_SYNONYMOUS_CODING</b> | <b>PCNXL2</b>             | <b>18</b> |
| 28         | 6168134 | A   | G | SYNONYMOUS_CODING            | PCNXL2                    | 9         |
| 28         | 6243190 | A   | G | <b>NON_SYNONYMOUS_CODING</b> | <b>ENSBTAG00000021183</b> | <b>1</b>  |
| 28         | 6298743 | C   | T | SYNONYMOUS_CODING            | ENSBTAG00000021183        | 13        |
| 28         | 6559804 | T   | C | UTR_3_PRIME                  | KCNK1_BOVIN               | 3         |
| 28         | 7185945 | T   | C | SYNONYMOUS_CODING            | SLC35F3                   | 5         |
| 28         | 7188541 | T   | C | INTRON                       | SLC35F3                   | 5         |
| 28         | 7188752 | G   | A | INTRON                       | SLC35F3                   | 6         |
| 28         | 7195511 | C   | T | SYNONYMOUS_CODING            | SLC35F3                   | 8         |
| 28         | 7195646 | T   | C | SYNONYMOUS_CODING            | SLC35F3                   | 8         |
| 28         | 7282915 | A   | G | SYNONYMOUS_CODING            | TARBP1                    | 10        |

|    |                |          |              |                              |                   |           |
|----|----------------|----------|--------------|------------------------------|-------------------|-----------|
| 28 | 7292308        | C        | A            | INTRON                       | TARBP1            | 7         |
| 28 | 7296396        | G        | A            | SYNONYMOUS_CODING            | TARBP1            | 6         |
| 28 | 7304942        | C        | T            | SYNONYMOUS_CODING            | TARBP1            | 2         |
| 28 | 7304960        | T        | C            | SYNONYMOUS_CODING            | TARBP1            | 2         |
| 28 | 7304965        | <b>C</b> | <b>T</b>     | <b>NON_SYNONYMOUS_CODING</b> | <b>TARBP1</b>     | <b>2</b>  |
| 28 | 7307397        | G        | A            | SYNONYMOUS_CODING            | TARBP1            | 1         |
| 28 | 7446928        | <b>T</b> | <b>G</b>     | <b>NON_SYNONYMOUS_CODING</b> | <b>IRF2BP2</b>    | <b>1</b>  |
| 28 | 7928014        | G        | A            | UTR_3_PRIME                  | TOM20_BOVIN       | 5         |
| 28 | 7928096        | G        | T            | UTR_3_PRIME                  | TOM20_BOVIN       | 5         |
| 28 | 7946879        | G        | GA           | UTR_3_PRIME                  | A8NJ74_BOVIN      | 12        |
| 28 | 8022387        | G        | C            | INTRON                       | ARID4B            | 9         |
| 28 | 8022387        | <b>G</b> | <b>C</b>     | <b>SPLICE_SITE_ACCEPTOR</b>  | <b>ARID4B</b>     | <b>10</b> |
| 28 | 8046931        | T        | TA           | INTRON                       | ARID4B            | 3         |
| 28 | 8210510        | G        | A            | SYNONYMOUS_CODING            | TBCE_BOVIN        | 4         |
| 28 | <b>8223073</b> | <b>C</b> | <b>T</b>     | <b>NON_SYNONYMOUS_CODING</b> | <b>TBCE_BOVIN</b> | <b>7</b>  |
| 28 | 8232316        | G        | A            | INTRON                       | TBCE_BOVIN        | 15        |
| 28 | 8232316        | G        | A            | UTR_3_PRIME                  | A7YY59_BOVIN      | 13        |
| 28 | 8342799        | T        | C            | UTR_3_PRIME                  | GNG4              | 4         |
| 28 | 8424006        | A        | G            | UTR_3_PRIME                  | LYST              | 51        |
| 28 | 8424588        | TA       | T            | INTRON                       | LYST              | 50        |
| 28 | 8450923        | G        | A            | SYNONYMOUS_CODING            | LYST              | 42        |
| 28 | <b>8492389</b> | <b>G</b> | <b>A</b>     | <b>NON_SYNONYMOUS_CODING</b> | <b>LYST</b>       | <b>26</b> |
| 28 | 8508758        | GAAA     | GA,G,<br>GAA | INTRON                       | LYST              | 18        |
| 28 | <b>8664873</b> | <b>A</b> | <b>G</b>     | <b>EXON</b>                  | <b>U6</b>         | <b>1</b>  |
| 28 | 8733389        | A        | ATG          | UTR_3_PRIME                  | NID1              | 31        |
| 28 | 8733559        | G        | A            | SYNONYMOUS_CODING            | NID1              | 31        |
| 28 | 8733580        | G        | A            | SYNONYMOUS_CODING            | NID1              | 31        |
| 28 | 8796044        | A        | C            | SYNONYMOUS_CODING            | NID1              | 7         |
| 28 | 8798180        | <b>T</b> | <b>C</b>     | <b>NON_SYNONYMOUS_CODING</b> | <b>NID1</b>       | <b>3</b>  |
| 28 | 8798200        | <b>A</b> | <b>G</b>     | <b>NON_SYNONYMOUS_CODING</b> | <b>NID1</b>       | <b>3</b>  |

|             |         |   |   |                       |              |    |
|-------------|---------|---|---|-----------------------|--------------|----|
| 28          | 8798242 | A | G | NON_SYNONYMOUS_CODING | NID1         | 3  |
| 28          | 8798266 | G | A | NON_SYNONYMOUS_CODING | NID1         | 3  |
| 28          | 8917765 | A | G | SYNONYMOUS_CODING     | GPR137B      | 3  |
| 28          | 8942111 | A | G | DOWNSTREAM            | GPR137B      |    |
| INTERGENIC  |         |   |   |                       |              |    |
| 28          | 9026323 | A | C | NON_SYNONYMOUS_CODING | ERO1LB       | 1  |
| 28          | 9242413 | A | G | DOWNSTREAM            | Q2YDD7_BOVIN |    |
| UTR_3_PRIME |         |   |   |                       | Q2KIF9_BOVIN | 44 |
| 28          | 9250434 | G | C | NON_SYNONYMOUS_CODING | Q2KIF9_BOVIN | 34 |
| 28          | 9264455 | A | G | SYNONYMOUS_CODING     | Q2KIF9_BOVIN | 20 |
| 28          | 9269959 | G | A | NON_SYNONYMOUS_CODING | Q2KIF9_BOVIN | 17 |
| 28          | 9273258 | T | C | SYNONYMOUS_CODING     | Q2KIF9_BOVIN | 14 |
| 28          | 9273312 | T | A | INTRON                | Q2KIF9_BOVIN | 13 |
| 28          | 9441112 | T | C | SYNONYMOUS_CODING     | ACTN2        | 15 |
| 28          | 9483580 | A | G | NON_SYNONYMOUS_CODING | MTR          | 2  |
| 28          | 9483679 | G | A | NON_SYNONYMOUS_CODING | MTR          | 2  |
